# Supplementary material
Source: MDPI journal article supplement (https://www.mdpi.com/2225-1154/11/4/80)
Supplement: s1 [file s1]

## Supplementary Material

**Suppl. Table S1.** The table presents trend analysis results for North American coastal sites during the 1948-1970 epoch, featuring the dominant climate index (CI), linear correlation coefficient (r) between coastal sea level and CI, Theil-Sen slope estimator, confidence intervals (CI) for Theil-Sen slope, and Modified Mann-Kendall (MK) trend test p-value for each site. Country and site name are also provided.

| CI   | r      | Theil-Sen Slope | CI1     | CI2     | Mann-Kendall | Name                           | Country | Trajectory |
|------|--------|-----------------|---------|---------|--------------|--------------------------------|---------|------------|
| EAWR | 0.7950 | 0.2506          | 0.2234  | 0.2895  | < 0.0001     | San Francisco                  | USA     | Increasing |
| AMO  | 0.9350 | 0.2479          | 0.2466  | 0.3111  | < 0.0001     | Halifax                        | CAN     | Increasing |
| NAO  | 0.8240 | 0.0298          | -0.0059 | 0.0518  | 0.7578       | Fernandina Beach               | USA     | Stable     |
| EAWR | 0.7900 | -1.1270         | -1.6541 | -0.9426 | 0.0100       | Trois-Rivieres                 | CAN     | Decreasing |
| AMO  | 0.7400 | 0.2657          | 0.1904  | 0.3130  | 0.0001       | Seattle                        | USA     | Increasing |
| CAR  | 0.9450 | 0.1225          | 0.0912  | 0.2201  | 0.0193       | Baltimore                      | USA     | Increasing |
| TSA  | 0.6720 | 0.2179          | 0.1741  | 0.2436  | 0.0003       | Honolulu                       | USA     | Increasing |
| WHWP | 0.9260 | 0.1259          | 0.1065  | 0.1911  | 0.0018       | San Diego (Quarantine Station) | USA     | Increasing |
| N4   | 0.8280 | 0.3704          | 0.2650  | 0.4068  | 0.0003       | Galveston II, Pier 21, Tx      | USA     | Increasing |
| NOI  | 0.8490 | 0.0000          | -0.1481 | 0.0612  | 0.7030       | Tofino                         | CAN     | Stable     |
| NOI  | 0.9220 | 0.0957          | 0.0311  | 0.1815  | 0.1939       | Victoria                       | CAN     | Stable     |
| PDO  | 0.8580 | 0.2248          | 0.1409  | 0.3095  | 0.0170       | Prince Rupert                  | CAN     | Increasing |
| SOI  | 0.6450 | -0.2031         | -0.2282 | -0.0425 | 0.5782       | Quebec (Lauzon)                | CAN     | Stable     |
| N4   | 0.7480 | 0.0652          | 0.0632  | 0.1806  | 0.0433       | Vancouver                      | CAN     | Increasing |
| AMO  | 0.8390 | 0.1745          | 0.1490  | 0.2187  | < 0.0001     | Harrington HBR                 | CAN     | Increasing |
| CAR  | 0.8810 | 0.2582          | 0.2271  | 0.3347  | < 0.0001     | Atlantic City                  | USA     | Increasing |
| NAO  | 0.4030 | 0.0000          | -0.0129 | 0.0761  | 0.0474       | Portland (Maine)               | USA     | Stable     |
| PNA  | 0.8920 | 0.0265          | -0.0496 | 0.0664  | 0.9875       | Key West                       | USA     | Stable     |
| PDO  | 0.8440 | 0.0926          | 0.0787  | 0.1892  | 0.0206       | Point Atkinson                 | CAN     | Increasing |
| PDO  | 0.9340 | 0.1674          | 0.1772  | 0.2659  | < 0.0001     | Saint John, N.B.               | CAN     | Increasing |
| NAO  | 0.7560 | 0.1952          | 0.0843  | 0.2406  | 0.1178       | Ketchikan                      | USA     | Stable     |
| CAR  | 0.9560 | 0.0356          | -0.0440 | 0.0941  | 0.8438       | Charleston I                   | USA     | Stable     |
| AMO  | 0.7320 | 0.0627          | 0.0645  | 0.1373  | 0.0010       | Boston                         | USA     | Increasing |
| N12  | 0.9210 | 0.0249          | -0.0040 | 0.0840  | 0.1936       | Los Angeles                    | USA     | Stable     |
| CAR  | 0.9360 | 0.0294          | -0.0701 | 0.0558  | 0.5526       | Pensacola                      | USA     | Stable     |
| WP   | 0.7340 | -0.3535         | -0.3998 | -0.2333 | 0.0020       | Astoria (Tongue Point)         | USA     | Decreasing |
| WP   | 0.7890 | 0.0695          | 0.0746  | 0.1475  | 0.0001       | Seavey Island                  | USA     | Increasing |
| MEI  | 0.7420 | 0.1483          | 0.0499  | 0.1982  | 0.3062       | Mayport                        | USA     | Stable     |
| AMO  | 0.9400 | 0.0938          | 0.0656  | 0.1830  | 0.0439       | Washington DC                  | USA     | Increasing |
| CAR  | 0.9480 | 0.2289          | 0.2036  | 0.3056  | < 0.0001     | Sandy Hook                     | USA     | Increasing |
| WHWP | 0.8070 | 0.1126          | 0.0135  | 0.1613  | 0.4206       | Fort Pulaski                   | USA     | Stable     |
| CAR  | 0.9450 | -0.8077         | -0.8744 | -0.7506 | < 0.0001     | Juneau                         | USA     | Decreasing |
| CAR  | 0.9770 | 0.1480          | 0.1302  | 0.2433  | 0.0037       | Solomon's Island (Biol. Lab.)  | USA     | Increasing |
| NP   | 0.7050 | -0.0217         | -0.0835 | 0.0681  | 0.8198       | Sitka                          | USA     | Stable     |
| PDO  | 0.8290 | 0.2553          | 0.2591  | 0.3244  | < 0.0001     | Charlottetown                  | CAN     | Increasing |
| QBO  | 0.8510 | 0.0645          | 0.0604  | 0.1483  | 0.0038       | New London                     | USA     | Increasing |
| NOI  | 0.9700 | 0.1406          | 0.1276  | 0.2025  | < 0.0001     | Alameda (Naval Air Station)    | USA     | Increasing |
| CAR  | 0.9300 | 0.7920          | 0.7184  | 0.8279  | < 0.0001     | Eugene Island                  | USA     | Increasing |
| PDO  | 0.9230 | 0.1940          | 0.1761  | 0.2941  | 0.0001       | Adak Sweeper Cove              | USA     | Increasing |
| AMO  | 0.7220 | -1.2544         | -1.3028 | -1.1296 | < 0.0001     | Skagway                        | USA     | Decreasing |
| AMO  | 0.6890 | 0.1667          | 0.1223  | 0.2351  | 0.0134       | Port Isabel                    | USA     | Increasing |
| MEI  | 0.8630 | 0.1234          | 0.0510  | 0.1596  | 0.1797       | St. Petersburg                 | USA     | Stable     |

**Suppl. Table S2.** As in Suppl. Table 1 but for the 1971-1994 epoch.

| CI  | r      | Theil-Sen Slope | CI1    | CI2    | Mann-Kendall | Name             | Country | Trajectory |
|-----|--------|-----------------|--------|--------|--------------|------------------|---------|------------|
| NOI | 0.9070 | 0.3119          | 0.2545 | 0.3319 | < 0.0001     | San Francisco    | USA     | Increasing |
| CAR | 0.9910 | 0.0746          | 0.0724 | 0.1570 | 0.0310       | Halifax          | CAN     | Increasing |
| TSA | 0.9510 | 0.1515          | 0.1343 | 0.1806 | < 0.0001     | Fernandina Beach | USA     | Increasing |

|      |        |         |         |         |          |                                |     |            |
|------|--------|---------|---------|---------|----------|--------------------------------|-----|------------|
| NOI  | 0.8400 | -1.2876 | -1.7753 | -1.1599 | < 0.0001 | Trois-Rivieres                 | CAN | Decreasing |
| N12  | 0.8560 | 0.0680  | 0.0682  | 0.1681  | 0.0106   | Seattle                        | USA | Increasing |
| TNA  | 0.8190 | 0.1328  | 0.0485  | 0.1706  | 0.3031   | Philadelphia (Pier 9N)         | USA | Stable     |
| WHWP | 0.8620 | 0.1757  | 0.1015  | 0.2271  | 0.0355   | Baltimore                      | USA | Increasing |
| QBO  | 0.6470 | 0.1324  | 0.1104  | 0.1873  | 0.0002   | Honolulu                       | USA | Increasing |
| SOI  | 0.9300 | 0.3764  | 0.3167  | 0.4052  | < 0.0001 | San Diego (Quarantine Station) | USA | Increasing |
| N4   | 0.8600 | 0.5735  | 0.4793  | 0.6054  | < 0.0001 | Galveston II, Pier 21, Tx      | USA | Increasing |
| N12  | 0.7920 | 0.0000  | 0.0222  | 0.1498  | 0.2137   | Victoria                       | CAN | Stable     |
| N12  | 0.8640 | 0.0925  | 0.0484  | 0.2034  | 0.1252   | Prince Rupert                  | CAN | Stable     |
| WP   | 0.8080 | 0.0000  | -0.0638 | 0.0441  | 0.9829   | Vancouver                      | CAN | Stable     |
| CAR  | 0.7620 | -0.0795 | -0.1176 | -0.0572 | 0.0222   | Portland (Maine)               | USA | Decreasing |
| EAWR | 0.8530 | 0.1561  | 0.1451  | 0.2476  | 0.0002   | Key West                       | USA | Increasing |
| EAWR | 0.8780 | -0.0811 | -0.1094 | 0.0031  | 0.6126   | Point Atkinson                 | CAN | Stable     |
| TNI  | 0.7810 | -0.8509 | -1.1589 | -0.7423 | 0.0003   | Deschaillons                   | CAN | Decreasing |
| TNA  | 0.7840 | 0.2183  | 0.1606  | 0.2676  | 0.0065   | Lewes (Breakwater Harbor)      | USA | Increasing |
| PNA  | 0.8060 | 0.1084  | 0.0533  | 0.1802  | 0.0834   | Ketchikan                      | USA | Stable     |
| WHWP | 0.7040 | 0.2291  | 0.1785  | 0.3101  | 0.0020   | Charleston I                   | USA | Increasing |
| WP   | 0.8020 | 0.0814  | 0.0311  | 0.0993  | 0.4458   | Boston                         | USA | Stable     |
| NOI  | 0.9640 | 0.1999  | 0.1555  | 0.2438  | 0.0001   | Los Angeles                    | USA | Increasing |
| TNA  | 0.6970 | 0.0000  | -0.0547 | 0.0705  | 0.9375   | Pensacola                      | USA | Stable     |
| N34  | 0.8860 | 0.4435  | 0.3912  | 0.4750  | < 0.0001 | La Jolla (Scripps Pier)        | USA | Increasing |
| N12  | 0.7500 | -0.1877 | -0.2332 | -0.0738 | 0.0746   | Astoria (Tongue Point)         | USA | Stable     |
| WHWP | 0.7070 | 0.1754  | 0.0940  | 0.2105  | 0.0322   | Annapolis (Naval Academy)      | USA | Increasing |
| EAWR | 0.8250 | 0.1972  | 0.1645  | 0.2984  | 0.0093   | Mayport                        | USA | Increasing |
| TNA  | 0.6280 | 0.1947  | 0.1555  | 0.2204  | 0.0004   | Newport                        | USA | Increasing |
| WHWP | 0.8330 | 0.1442  | 0.0563  | 0.1947  | 0.3266   | Washington DC                  | USA | Stable     |
| PDO  | 0.8940 | 0.1190  | 0.0769  | 0.1443  | 0.0824   | Woods Hole (Ocean. Inst.)      | USA | Stable     |
| NOI  | 0.9150 | 0.0000  | -0.0586 | 0.0522  | 0.9932   | Crescent City                  | USA | Stable     |
| N12  | 0.8900 | 0.0882  | 0.0775  | 0.1840  | 0.0111   | Friday Harbor (Ocean. Labs.)   | USA | Increasing |
| NP   | 0.7960 | -0.3600 | -0.3211 | -0.1584 | 0.0110   | Neah Bay                       | USA | Decreasing |
| EAWR | 0.8130 | 0.0968  | 0.0369  | 0.1445  | 0.3571   | Wilmington                     | USA | Stable     |
| WHWP | 0.8420 | -0.9525 | -1.0034 | -0.9021 | < 0.0001 | Juneau                         | USA | Decreasing |
| EAWR | 0.7860 | 0.2824  | 0.1989  | 0.3063  | 0.0011   | Solomon's Island (Biol. Lab.)  | USA | Increasing |
| PNA  | 0.8930 | -0.1984 | -0.2546 | -0.1280 | 0.0126   | Sitka                          | USA | Decreasing |
| N12  | 0.8480 | 0.2509  | 0.1961  | 0.2791  | < 0.0001 | Port San Luis                  | USA | Increasing |
| EAWR | 0.7140 | 0.2317  | 0.1889  | 0.2896  | 0.0002   | St. Petersburg                 | USA | Increasing |
| N12  | 0.7250 | -0.1746 | -0.1967 | -0.0736 | 0.0205   | Port Alberni                   | CAN | Decreasing |
| MEI  | 0.7840 | 0.2515  | 0.2129  | 0.3245  | 0.0006   | Gloucester Point               | USA | Increasing |
| NAO  | 0.9180 | 0.3693  | 0.3519  | 0.4768  | < 0.0001 | Freeport                       | USA | Increasing |
| NOI  | 0.7150 | 0.1235  | 0.0999  | 0.1803  | 0.0011   | Nawiliwili Bay, Kauai Island   | USA | Increasing |
| WHWP | 0.8270 | -0.7756 | -0.8871 | -0.7305 | < 0.0001 | Seldovia                       | USA | Decreasing |
| N12  | 0.8370 | 0.0137  | 0.0275  | 0.1608  | 0.0972   | South Beach                    | USA | Stable     |
| NOI  | 0.6950 | 0.0000  | -0.0204 | 0.1355  | 0.4282   | Bamfield                       | CAN | Stable     |
| EAWR | 0.8520 | 0.1716  | 0.0883  | 0.1998  | 0.0540   | Cambridge II                   | USA | Stable     |
| NP   | 0.5930 | -0.2007 | -0.2765 | -0.1546 | 0.0006   | Campbell River                 | CAN | Decreasing |
| N3   | 0.7600 | 0.0279  | 0.0454  | 0.1699  | 0.0377   | Port Townsend                  | USA | Increasing |
| WHWP | 0.6990 | 0.2960  | 0.2331  | 0.3364  | < 0.0001 | Beaufort, North Carolina       | USA | Increasing |
| WHWP | 0.8000 | 0.3333  | 0.2692  | 0.3822  | < 0.0001 | Lewisetta, Virginia            | USA | Increasing |

**Suppl. Table S3.** As in Suppl. Table 1 but for the 1995-2018 epoch.

| CI   | r      | Theil-Sen Slope | CI1    | CI2    | Mann-Kendall | Name                   | Country | Trajectory |
|------|--------|-----------------|--------|--------|--------------|------------------------|---------|------------|
| WHWP | 0.9440 | 0.1756          | 0.1556 | 0.2406 | 0.0000       | San Francisco          | USA     | Increasing |
| WHWP | 0.4900 | 0.2697          | 0.0779 | 0.7302 | 0.3464       | Trois-Rivieres         | CAN     | Stable     |
| WHWP | 0.9030 | 0.2127          | 0.1610 | 0.2551 | 0.0001       | Seattle                | USA     | Increasing |
| EAWR | 0.8120 | 0.4281          | 0.3350 | 0.4708 | 0.0000       | Philadelphia (Pier 9N) | USA     | Increasing |
| WHWP | 0.8140 | 0.4149          | 0.3282 | 0.4622 | 0.0000       | Baltimore              | USA     | Increasing |
| N4   | 0.8440 | 0.1749          | 0.1300 | 0.2102 | 0.0000       | Honolulu               | USA     | Increasing |

|      |        |         |         |         |        |                                |     |            |
|------|--------|---------|---------|---------|--------|--------------------------------|-----|------------|
| WHWP | 0.9680 | 0.4180  | 0.3932  | 0.4773  | 0.0000 | San Diego (Quarantine Station) | USA | Increasing |
| CAR  | 0.9330 | 0.7057  | 0.6219  | 0.7589  | 0.0000 | Galveston II, Pier 21, TX      | USA | Increasing |
| N12  | 0.7560 | 0.0000  | -0.1116 | 0.0623  | 0.9468 | Tofino                         | CAN | Stable     |
| WHWP | 0.9880 | 0.1802  | 0.1273  | 0.2322  | 0.0031 | Victoria                       | CAN | Increasing |
| NTA  | 0.7830 | 0.0000  | -0.0234 | 0.1452  | 0.4596 | Prince Rupert                  | CAN | Stable     |
| WHWP | 0.9630 | 0.2500  | 0.2046  | 0.3015  | 0.0001 | Vancouver                      | CAN | Increasing |
| EAWR | 0.9110 | 0.3075  | 0.2626  | 0.3353  | 0.0000 | Portland (Maine)               | USA | Increasing |
| EAWR | 0.9820 | 0.4645  | 0.4022  | 0.4943  | 0.0000 | Key West                       | USA | Increasing |
| WHWP | 0.6740 | 0.2391  | 0.1695  | 0.4077  | 0.1006 | Neuville                       | CAN | Stable     |
| WHWP | 0.9820 | 0.1869  | 0.1575  | 0.2495  | 0.0010 | Point Atkinson                 | CAN | Increasing |
| WHWP | 0.5730 | 0.2146  | 0.1374  | 0.5932  | 0.2087 | Deschailons                    | CAN | Stable     |
| EAWR | 0.9110 | 0.4478  | 0.3925  | 0.4894  | 0.0000 | Lewes (Breakwater Harbor)      | USA | Increasing |
| PNA  | 0.6160 | -0.2050 | -0.2301 | -0.0865 | 0.0577 | Ketchikan                      | USA | Stable     |
| WHWP | 0.8970 | 0.4504  | 0.3750  | 0.5009  | 0.0000 | Charleston I                   | USA | Increasing |
| NP   | 0.7870 | 0.4291  | 0.3794  | 0.4487  | 0.0000 | Boston                         | USA | Increasing |
| WHWP | 0.9710 | 0.2510  | 0.2185  | 0.3003  | 0.0000 | Los Angeles                    | USA | Increasing |
| WHWP | 0.9440 | 0.2677  | 0.2334  | 0.3186  | 0.0000 | La Jolla (Scripps Pier)        | USA | Increasing |
| N12  | 0.7940 | 0.1009  | -0.0050 | 0.1563  | 0.7428 | Astoria (Tongue Point)         | USA | Stable     |
| EAWR | 0.9570 | -0.3695 | -0.4603 | -0.2946 | 0.0003 | Seward                         | USA | Decreasing |
| WP   | 0.8910 | 0.4249  | 0.3498  | 0.4820  | 0.0000 | Annapolis (Naval Academy)      | USA | Increasing |
| EAWR | 0.9540 | 0.3567  | 0.3061  | 0.3861  | 0.0000 | Newport                        | USA | Increasing |
| WP   | 0.8910 | 0.3574  | 0.2930  | 0.4461  | 0.0000 | Washington Dc                  | USA | Increasing |
| WHWP | 0.9740 | 0.2394  | 0.2152  | 0.3012  | 0.0000 | Santa Monica (Municipal Pier)  | USA | Increasing |
| SOI  | 0.9380 | -0.0611 | -0.1368 | -0.0327 | 0.2235 | Crescent City                  | USA | Stable     |
| WHWP | 0.9620 | 0.2000  | 0.1387  | 0.2349  | 0.0006 | Friday Harbor (Ocean. Labs.)   | USA | Increasing |
| NOI  | 0.6440 | -0.1484 | -0.2246 | -0.0821 | 0.0599 | Neah Bay                       | USA | Stable     |
| NTA  | 0.9870 | 0.1553  | 0.1523  | 0.2637  | 0.0169 | St. John's, Nfld.              | CAN | Increasing |
| EAWR | 0.9370 | 0.4167  | 0.3423  | 0.4708  | 0.0000 | Fort Pulaski                   | USA | Increasing |
| WHWP | 0.9800 | 0.3919  | 0.3353  | 0.4508  | 0.0000 | Wilmington                     | USA | Increasing |
| EAWR | 0.9070 | -1.0762 | -1.1651 | -1.0555 | 0.0000 | Juneau                         | USA | Decreasing |
| NAO  | 0.8970 | 0.4881  | 0.4421  | 0.5535  | 0.0000 | Solomon's Island (Biol. Lab.)  | USA | Increasing |
| WP   | 0.7930 | -0.4294 | -0.5085 | -0.3605 | 0.0000 | Sitka                          | USA | Decreasing |
| EAWR | 0.9590 | 0.3708  | 0.3148  | 0.3992  | 0.0000 | New London                     | USA | Increasing |
| CAR  | 0.9410 | 0.1009  | 0.0752  | 0.1626  | 0.0228 | Alameda (Naval Air Station)    | USA | Increasing |
| EAWR | 0.8910 | -1.4478 | -1.5133 | -1.3600 | 0.0000 | Yakutat                        | USA | Decreasing |
| NTA  | 0.8000 | -0.2712 | -0.4324 | -0.2657 | 0.0002 | Churchill                      | CAN | Decreasing |
| N12  | 0.8690 | -0.1745 | -0.2339 | -0.1355 | 0.0055 | Adak Sweeper Cove              | USA | Decreasing |
| WHWP | 0.9110 | -1.7259 | -1.7955 | -1.6633 | 0.0000 | Skagway                        | USA | Decreasing |
| EAWR | 0.9130 | 0.3835  | 0.3367  | 0.4382  | 0.0000 | Port Isabel                    | USA | Increasing |
| WHWP | 0.9740 | 0.2381  | 0.2099  | 0.3009  | 0.0000 | Port San Luis                  | USA | Increasing |
| CAR  | 0.9080 | 0.4581  | 0.4202  | 0.5163  | 0.0000 | St. Petersburg                 | USA | Increasing |
| PDO  | 0.8970 | 0.1366  | 0.1228  | 0.2022  | 0.0000 | Kahului Harbor, Maui Island    | USA | Increasing |
| CAR  | 0.9560 | 0.8077  | 0.7337  | 0.8442  | 0.0000 | Grand Isle                     | USA | Increasing |
| WHWP | 0.9020 | 0.6154  | 0.5439  | 0.6839  | 0.0000 | Rockport                       | USA | Increasing |
| NP   | 0.6940 | -0.1224 | -0.1871 | -0.0237 | 0.3830 | Cordova                        | USA | Stable     |
| EAWR | 0.9770 | -0.7834 | -0.8319 | -0.7240 | 0.0000 | Kodiak Island, Womens Bay      | USA | Decreasing |
| NOI  | 0.9350 | -0.0346 | -0.1276 | 0.0030  | 0.4614 | Unalaska                       | USA | Stable     |
| TNI  | 0.7900 | 0.2887  | 0.2242  | 0.3552  | 0.0003 | Reedy Point                    | USA | Increasing |
| CAR  | 0.9550 | 0.1493  | 0.1298  | 0.2335  | 0.0007 | Queen Charlotte City           | CAN | Increasing |
| N12  | 0.6630 | 0.2158  | 0.1406  | 0.4206  | 0.2032 | Portneuf                       | CAN | Stable     |
| WHWP | 0.7760 | 0.0000  | -0.0803 | 0.0922  | 0.9263 | Bella Bella                    | CAN | Stable     |
| EAWR | 0.9600 | -0.2818 | -0.3231 | -0.1890 | 0.0042 | Anchorage                      | USA | Decreasing |
| NAO  | 0.8730 | 0.3241  | 0.2733  | 0.3705  | 0.0000 | Bridgeport                     | USA | Increasing |
| EAWR | 0.9710 | -0.7366 | -0.8026 | -0.6438 | 0.0000 | Seldovia                       | USA | Decreasing |
| AMO  | 0.7970 | 0.0000  | -0.0848 | 0.0758  | 0.8508 | Port Hardy                     | CAN | Stable     |
| EAWR | 0.9590 | 0.4652  | 0.4246  | 0.4978  | 0.0000 | Nantucket Island               | USA | Increasing |
| WHWP | 0.9250 | 0.1581  | 0.1179  | 0.2228  | 0.0034 | Patricia Bay                   | CAN | Increasing |

|      |        |         |         |         |        |                                     |     |            |
|------|--------|---------|---------|---------|--------|-------------------------------------|-----|------------|
| EAWR | 0.9180 | 0.4539  | 0.3955  | 0.4921  | 0.0000 | Cape May                            | USA | Increasing |
| NTA  | 0.9420 | 0.4444  | 0.3959  | 0.4555  | 0.0000 | Yarmouth                            | CAN | Increasing |
| WHWP | 0.9480 | 0.1966  | 0.1194  | 0.2533  | 0.0147 | South Beach                         | USA | Increasing |
| PDO  | 0.8840 | 0.0000  | -0.1175 | 0.0368  | 0.7347 | Bamfield                            | CAN | Stable     |
| WHWP | 0.8760 | 0.1762  | 0.1590  | 0.4106  | 0.0394 | New Westminster                     | CAN | Increasing |
| WHWP | 0.8570 | 0.0913  | 0.0192  | 0.1393  | 0.1808 | Charleston II                       | USA | Stable     |
| WP   | 0.8360 | 0.3966  | 0.3425  | 0.4489  | 0.0000 | Cambridge II                        | USA | Increasing |
| WP   | 0.8840 | 0.4546  | 0.4311  | 0.5075  | 0.0000 | North Sydney                        | CAN | Increasing |
| NAO  | 0.9000 | -0.1691 | -0.2572 | -0.1748 | 0.0000 | Sept-Iles                           | CAN | Decreasing |
| TNA  | 0.6300 | 0.0000  | -0.1136 | 0.0394  | 0.2986 | Campbell River                      | CAN | Stable     |
| WHWP | 0.9520 | 0.1878  | 0.1325  | 0.2308  | 0.0020 | Port Townsend                       | USA | Increasing |
| EAWR | 0.9600 | -1.0631 | -1.1135 | -0.9714 | 0.0000 | Nikiski, Alaska                     | USA | Decreasing |
| CAR  | 0.9440 | 0.2521  | 0.2264  | 0.3117  | 0.0000 | Monterey                            | USA | Increasing |
| EAWR | 0.9730 | -0.8295 | -0.8646 | -0.7214 | 0.0000 | Valdez                              | USA | Decreasing |
| AO   | 0.7700 | -0.2185 | -0.2946 | -0.1244 | 0.0850 | Toke Point, Willipa Bay, WA         | USA | Stable     |
| WHWP | 0.9500 | 0.2655  | 0.2196  | 0.3136  | 0.0000 | Point Reyes                         | USA | Increasing |
| EAWR | 0.9560 | 0.0199  | 0.0085  | 0.1198  | 0.9214 | Rimouski                            | CAN | Stable     |
| CAR  | 0.9630 | 0.0212  | -0.0098 | 0.0906  | 0.2101 | Cherry Point                        | USA | Stable     |
| N4   | 0.9700 | 0.1512  | 0.0862  | 0.2615  | 0.0263 | Sand Point, Popof Is., AK           | USA | Increasing |
| EAWR | 0.8540 | 0.4268  | 0.3673  | 0.4689  | 0.0000 | Chesapeake Bay Br. Tun.             | USA | Increasing |
| WHWP | 0.9360 | 0.4486  | 0.4043  | 0.4997  | 0.0000 | N. Spit, Humboldt Bay               | USA | Increasing |
| N12  | 0.9860 | 0.4754  | 0.4158  | 0.5376  | 0.0000 | Panama City, St.Andrews Bay, Fl     | USA | Increasing |
| EAWR | 0.6950 | 0.3366  | 0.1398  | 0.6683  | 0.3011 | Becancour                           | CAN | Stable     |
| CAR  | 0.8670 | 0.0000  | -0.1044 | 0.0900  | 0.9526 | Winter Harbour                      | CAN | Stable     |
| WHWP | 0.8890 | 0.1660  | 0.1404  | 0.2377  | 0.0003 | Arena Cove, California              | USA | Increasing |
| N12  | 0.8250 | 0.0887  | 0.0303  | 0.1405  | 0.1389 | Port Angeles, Washington            | USA | Stable     |
| WHWP | 0.9130 | 0.4602  | 0.3857  | 0.4963  | 0.0000 | Beaufort, North Carolina            | USA | Increasing |
| NAO  | 0.9530 | 0.3290  | 0.2856  | 0.4081  | 0.0000 | Tolchester Beach, Maryland          | USA | Increasing |
| EAWR | 0.8920 | 0.5420  | 0.4750  | 0.5896  | 0.0000 | Lewisetta, Virginia                 | USA | Increasing |
| WHWP | 0.9310 | 0.4963  | 0.4402  | 0.5476  | 0.0000 | Oregon Inlet Marina, North Carolina | USA | Increasing |
| WHWP | 0.6670 | 0.1543  | 0.1194  | 0.2169  | 0.0032 | Port Chicago, California            | USA | Increasing |
| EAWR | 0.9730 | -0.8295 | -0.8646 | -0.7214 | 0.0000 | Valdez                              | USA | Decreasing |
| AO   | 0.7700 | -0.2185 | -0.2946 | -0.1244 | 0.0850 | Toke Point, Willipa Bay, WA         | USA | Stable     |
| WHWP | 0.9500 | 0.2655  | 0.2196  | 0.3136  | 0.0000 | Point Reyes                         | USA | Increasing |
| EAWR | 0.9560 | 0.0199  | 0.0085  | 0.1198  | 0.9214 | Rimouski                            | CAN | Stable     |
| CAR  | 0.9630 | 0.0212  | -0.0098 | 0.0906  | 0.2101 | Cherry Point                        | USA | Stable     |
| N4   | 0.9700 | 0.1512  | 0.0862  | 0.2615  | 0.0263 | Sand Point, Popof Is., AK           | USA | Increasing |
| EAWR | 0.8540 | 0.4268  | 0.3673  | 0.4689  | 0.0000 | Chesapeake Bay Br. Tun.             | USA | Increasing |
| WHWP | 0.9360 | 0.4486  | 0.4043  | 0.4997  | 0.0000 | N. Spit, Humboldt Bay               | USA | Increasing |
| N12  | 0.9860 | 0.4754  | 0.4158  | 0.5376  | 0.0000 | Panama City, St.Andrews Bay, Fl     | USA | Increasing |
| EAWR | 0.6950 | 0.3366  | 0.1398  | 0.6683  | 0.3011 | Becancour                           | CAN | Stable     |
| CAR  | 0.8670 | 0.0000  | -0.1044 | 0.0900  | 0.9526 | Winter Harbour                      | CAN | Stable     |
| WHWP | 0.8890 | 0.1660  | 0.1404  | 0.2377  | 0.0003 | Arena Cove, California              | USA | Increasing |
| N12  | 0.8250 | 0.0887  | 0.0303  | 0.1405  | 0.1389 | Port Angeles, Washington            | USA | Stable     |
| WHWP | 0.9130 | 0.4602  | 0.3857  | 0.4963  | 0.0000 | Beaufort, North Carolina            | USA | Increasing |
| NAO  | 0.9530 | 0.3290  | 0.2856  | 0.4081  | 0.0000 | Tolchester Beach, Maryland          | USA | Increasing |
| EAWR | 0.8920 | 0.5420  | 0.4750  | 0.5896  | 0.0000 | Lewisetta, Virginia                 | USA | Increasing |
| WHWP | 0.6670 | 0.1543  | 0.1194  | 0.2169  | 0.0032 | Port Chicago, California            | USA | Increasing |
